# Supplementary material
Source: PubMed Central journal article supplement (PMC7611436)
Supplement: EMS118803-supplement-Supporting_Information.pdf [file EMS118803-supplement-Supporting_Information.pdf]

## Supplementary Information

### Investigating the nature of active forces in tissues reveals how contractile cells can form extensile monolayers

Lakshmi Balasubramaniam<sup>1\*</sup> Amin Doostmohammadi,<sup>2,3\*</sup> Thuan Beng Saw,<sup>4,5</sup> Gautham Hari Narayana Sankara Narayana,<sup>1</sup> Romain Mueller,<sup>3</sup> Tien Dang,<sup>1</sup> Minnah Thomas,<sup>4</sup> Shafali Gupta,<sup>6</sup> Surabhi Sonam,<sup>1,7</sup> Alpha S. Yap,<sup>6</sup> Yusuke Toyama,<sup>4</sup> René-Marc Mège,<sup>1</sup> Julia Yeomans,<sup>3</sup> Benoît Ladoux<sup>1</sup>

1 Institut Jacques Monod (IJM), CNRS UMR 7592 et Université de Paris, 75013 Paris, France,

2Niels Bohr Institute, University of Copenhagen, Blegdamsvej 17, 2100 Copenhagen, Denmark

3 The Rudolf Peierls Centre for Theoretical Physics, University of Oxford, Parks Road, Oxford OX1 3PU, UK

4 Mechanobiology Institute (MBI), National University of Singapore, Singapore, 117411

5 National University of Singapore, Department of Biomedical Engineering, 4 Engineering Drive 3, Engineering Block 4, # 04-08, Singapore, 117583

6 Division of Cell and Developmental Biology, Institute for Molecular Bioscience, The University of Queensland, St. Lucia, Brisbane, QLD 4072, Australia

7 Present address: D Y Patil International University, Akurdi, Pune, India

**\*These authors contributed equally to this work**

**Supplementary Table 1**

| <b>Drug</b>               | <b>Pathway affected</b> | <b>MDCK WT</b> | <b>MDCK E-cadherin KO</b> |
|---------------------------|-------------------------|----------------|---------------------------|
| No drug                   | --                      | Extensile      | Contractile               |
| Blebbistatin (5 $\mu$ M)  | Non-muscle Myosin II    | --             | Contractile               |
| Blebbistatin (20 $\mu$ M) | Non-muscle Myosin II    | Extensile      | Extensile                 |
| Y27632 (25 $\mu$ M)       | ROCK 1 and 2            | Extensile      | Extensile                 |

**Supplementary Video legends**

Video 1: | Phase contrast images overlaid with orientation vectors obtained from MDCK WT monolayers. Blue arrow shows the location of a +1/2 (comet) shaped defect and the direction in which they move. Scale bar: 50 $\mu$ m

Video 2: | Phase contrast images overlaid with orientation vectors obtained from MDCK E-cadherin KO monolayers. Blue arrow shows the location of a +1/2 (comet) shaped defect and the direction in which they move. Scale bar: 50 $\mu$ m

Video 3: | Time lapse demixing of extensile (magenta) and contractile (green) particles obtained from simulations.

Video 4: | Time lapse demixing of MDCK WT (extensile-magenta) and MDCK E-cadherin KO (contractile-green) cells observed from experiments. Scale bar: 100 $\mu$ m

Video 5: | Time lapse demixing of MDCK WT (extensile-magenta) and MDCK E-cadherin KO (contractile-green) cells before and after the addition of 20 $\mu$ M blebbistatin. Scale bar: 100 $\mu$ m
